# Supplementary material for: Attachment Representations in Children with and without Attention-Deficit/Hyperactivity Disorder (ADHD)
Source: Brain Sci. 2021 Nov 16;11(11):1516. doi: 10.3390/brainsci11111516 (PMC8615467; doi:10.3390/brainsci11111516)
Supplement: Supplementary file 1 [file brainsci-11-01516-s001.zip › brainsci-1447024-supplementary.pdf]

## Supplementary Materials

**Table S1.** Bootstrapped linear regression analyses with ODD symptoms and age as independent variables.

|                                                              | <i>B (95% ci)</i> | <i>SE</i> | $\beta$ | <i>p</i> |
|--------------------------------------------------------------|-------------------|-----------|---------|----------|
| <b><i>Secure attachment (<math>R^2=.02</math>)</i></b>       |                   |           |         |          |
| ODD symptoms                                                 | -.05 (-.15;.05)   | .05       | -.10    | .33      |
| Age                                                          | .01 (-.01;.02)    | .01       | .10     | .31      |
| <b><i>Avoidant attachment (<math>R^2=.01</math>)</i></b>     |                   |           |         |          |
| ODD symptoms                                                 | -.02 (-.10;.05)   | .04       | -.06    | .57      |
| Age                                                          | .00 (-.00;.01)    | .00       | .07     | .40      |
| <b><i>Ambivalent attachment (<math>R^2=.01</math>)</i></b>   |                   |           |         |          |
| ODD symptoms                                                 | .00 (-.04;.05)    | .02       | .01     | .93      |
| Age                                                          | -.00 (-.01;.00)   | .00       | -.08    | .30      |
| <b><i>Disorganized attachment (<math>R^2=.05</math>)</i></b> |                   |           |         |          |
| ODD symptoms                                                 | .05 (-.05;.15)    | .05       | .11     | .30      |
| Age                                                          | -.01 (-.02;.00)   | .01       | -.18    | .11      |

**Table S2.** Bootstrapped linear regression analyses with parental education level and age as independent variables.

|                                                              | <i>B (95% ci)</i> | <i>SE</i> | $\beta$ | <i>p</i> |
|--------------------------------------------------------------|-------------------|-----------|---------|----------|
| <b><i>Secure attachment (<math>R^2=.03</math>)</i></b>       |                   |           |         |          |
| Parental education levels                                    | .16 (-.08;.50)    | .15       | .14     | .27      |
| Age                                                          | .00 (-.01;.02)    | .01       | .07     | .48      |
| <b><i>Avoidant attachment (<math>R^2=.01</math>)</i></b>     |                   |           |         |          |
| Parental education levels                                    | .06 (-.09;.19)    | .07       | .07     | .42      |
| Age                                                          | .00 (-.00;.01)    | .00       | .05     | .59      |
| <b><i>Ambivalent attachment (<math>R^2=.00</math>)</i></b>   |                   |           |         |          |
| Parental education levels                                    | -.01 (-.10;.07)   | .04       | -.02    | .84      |
| Age                                                          | -.00 (-.01;.00)   | .00       | -.04    | .58      |
| <b><i>Disorganized attachment (<math>R^2=.05</math>)</i></b> |                   |           |         |          |
| Parental education levels                                    | -.15 (-.40;.01)   | .11       | -.15    | .14      |
| Age                                                          | -.01 (-.02;.00)   | .01       | -.14    | .21      |

**Table S3.** Bootstrapped linear regression analyses within ADHD group (only combined presentation).

|                                       | <i>B (95% ci)</i> | <i>SE</i> | $\beta$ | <i>p</i> |
|---------------------------------------|-------------------|-----------|---------|----------|
| <b><i>Secure attachment</i></b>       |                   |           |         |          |
| Age                                   | .01 (-.01;.03)    | .01       | .12     | .52      |
| Parental education levels             | .02 (-.51;.60)    | .29       | .02     | .93      |
| ODD symptoms                          | -.06 (-.27;.15)   | .10       | -.11    | .58      |
| Expressed Emotion                     | .03 (-.25;.35)    | .15       | .04     | .83      |
| Parenting Sense of Competence         | .00 (-.06;.05)    | .03       | .02     | .93      |
| <b><i>Avoidant attachment</i></b>     |                   |           |         |          |
| Age                                   | -.01 (-.02;.01)   | .01       | -.16    | .34      |
| Parental education levels             | .09 (-.17;.36)    | .14       | .14     | .50      |
| ODD symptoms                          | -.00 (-.14;.12)   | .07       | -.01    | .98      |
| Expressed Emotion                     | .05 (-.16;.21)    | .09       | .11     | .57      |
| Parenting Sense of Competence         | -.01 (-.05;.03)   | .02       | -.10    | .67      |
| <b><i>Ambivalent attachment</i></b>   |                   |           |         |          |
| Age                                   | -.00 (-.01;.01)   | .01       | -.07    | .58      |
| Parental education levels             | .05 (-.15;.29)    | .11       | .09     | .61      |
| ODD Symptoms                          | -.01 (-.11;.10)   | .05       | -.04    | .81      |
| Expressed Emotion                     | -.00 (-.15;.17)   | .08       | -.01    | .98      |
| Parenting Sense of Competence         | .01 (-.02;.04)    | .02       | .14     | .49      |
| <b><i>Disorganized attachment</i></b> |                   |           |         |          |

|                               |                 |     |      |     |
|-------------------------------|-----------------|-----|------|-----|
| Age                           | -.01 (-.04;.02) | .01 | -.11 | .62 |
| Parental education levels     | -.06 (-.59;.40) | .25 | -.06 | .79 |
| ODD Symptoms                  | .07 (-.11;.27)  | .10 | .13  | .46 |
| Expressed Emotion             | -.09 (-.37;.29) | .17 | -.12 | .60 |
| Parenting Sense of Competence | .01 (-.04;.07)  | .03 | .07  | .74 |

Note: Independent variables were added hierarchically in three blocks, this Table depicts the results from the final block containing all predictors. The  $\beta$  column represents standardized coefficients, all other statistics are from bootstrapped analyses.

**Table S4.** Bootstrapped linear regression analyses within ADHD group (only inattentive presentation).

|                                       | <i>B (95% ci)</i> | <i>SE</i> | <i><math>\beta</math></i> | <i>p</i> |
|---------------------------------------|-------------------|-----------|---------------------------|----------|
| <b><i>Secure attachment</i></b>       |                   |           |                           |          |
| Age                                   | .01 (-.05;.07)    | .03       | .07                       | .81      |
| Parental education levels             | .29 (-.49;1.15)   | .42       | .25                       | .38      |
| ODD symptoms                          | .11 (-.36;.52)    | .22       | .20                       | .54      |
| Expressed Emotion                     | .41 (-.43;1.35)   | .47       | .37                       | .37      |
| Parenting Sense of Competence         | .01 (-.09;.08)    | .04       | .05                       | .87      |
| <b><i>Avoidant attachment</i></b>     |                   |           |                           |          |
| Age                                   | .01 (-.04;.06)    | .03       | .17                       | .55      |
| Parental education levels             | .07 (-.79;.90)    | .41       | .07                       | .76      |
| ODD symptoms                          | -.23 (-.68;.13)   | .19       | -.44                      | .20      |
| Expressed Emotion                     | .21 (-.69;1.25)   | .46       | .20                       | .59      |
| Parenting Sense of Competence         | -.01 (-.09;.07)   | .04       | -.11                      | .71      |
| <b><i>Ambivalent attachment</i></b>   |                   |           |                           |          |
| Age                                   | -.01 (-.04;.01)   | .01       | -.34                      | .25      |
| Parental education levels             | -.02 (-.52;.34)   | .22       | -.04                      | .88      |
| ODD Symptoms                          | .03 (-.17;.19)    | .10       | .12                       | .62      |
| Expressed Emotion                     | -.22 (-.68;.35)   | .26       | -.44                      | .31      |
| Parenting Sense of Competence         | -.00 (-.05;.03)   | .02       | -.06                      | .88      |
| <b><i>Disorganized attachment</i></b> |                   |           |                           |          |
| Age                                   | -.01 (-.05;.02)   | .02       | -.36                      | .37      |
| Parental education levels             | -.21 (-.54;.23)   | .25       | -.37                      | .24      |
| ODD Symptoms                          | .05 (-.15;.24)    | .11       | .17                       | .64      |
| Expressed Emotion                     | -.31 (-.69;.16)   | .27       | -.56                      | .18      |
| Parenting Sense of Competence         | -.01 (-.04;.03)   | .02       | -.13                      | .67      |

Note: Independent variables were added hierarchically in three blocks, this Table depicts the results from the final block containing all predictors. The  $\beta$  column represents standardized coefficients, all other statistics are from bootstrapped analyses.
